# Supplementary material for: Increased risk of early and medium-term revision after post-fracture total knee arthroplasty: Results from the Danish Knee Arthroplasty Register
Source: PubMed Central journal article supplement — Acta Orthop. 2017 Feb 14;88(3):263–8. doi: 10.1080/17453674.2017.1290479 (PMC5434593; doi:10.1080/17453674.2017.1290479), 2017-02-14
Supplement: IORT_A_1290479_SM0119.pdf [file IORT_A_1290479_SM0119.pdf]

## Supplementary data

Table 1. The distribution of patients with missing variables. Only patients with complete registrations were included in the study. Some registrations had more than one missing variable, thus explaining the discrepancy between the number of patients with missing observations and the final number of patients with complete registrations

|                                                | PTFA          | OA              |
|------------------------------------------------|---------------|-----------------|
| Total no. of TKAs registered                   | 1,475         | 53,502          |
| Registrations missing                          |               |                 |
| Weight                                         | 36            | 1,876           |
| Charnley class                                 | 10            | 230             |
| Duration of surgery                            | 11            | 180             |
| Vital status                                   | 4             | 197             |
| Patients weighing > 200 or < 30 kg             | 0             | 13              |
| Revision registered before primary surgery     | 0             | 22              |
| Total no. of TKAs with complete registrations: | 1,421<br>(3%) | 51,097<br>(97%) |

Table 3. Hazard ratios for the risk of revision of TKA inserted due to PTFA, with OA as reference (calculated by Cox regression). Adjusted hazard ratios are based on the following covariates: sex, weight, Charnley class, perioperative complications, and the need for additional component supplementation

|                       | Entire      | < 1 year    | 1 – 5 years | > 5 years   |
|-----------------------|-------------|-------------|-------------|-------------|
| <b>Age &lt; 50</b>    |             |             |             |             |
| Crude hazard ratio    | 1.68        | 2.71        | 1.23        | 1.93        |
| (95% CI)              | (1.21–2.32) | (1.49–4.92) | (0.72–2.09) | (0.91–4.11) |
| p-value               | 0.002       | 0.001       | 0.5         | 0.09        |
| Adjusted hazard ratio | 1.55        | 2.52        | 1.08        | 1.83        |
| (95% CI)              | (1.11–2.16) | (1.41–4.48) | (0.59–1.99) | (0.82–4.09) |
| p-value               | 0.01        | 0.002       | 0.8         | 0.1         |
| <b>Age 50–70</b>      |             |             |             |             |
| Crude hazard ratio    | 1.64        | 1.80        | 1.72        | 1.30        |
| (95% CI)              | (1.37–1.96) | (1.20–2.69) | (1.25–2.36) | (0.79–2.14) |
| p-value               | < 0.001     | 0.004       | 0.001       | 0.3         |
| Adjusted hazard ratio | 1.46        | 1.62        | 1.48        | 1.17        |
| (95% CI)              | (1.21–1.76) | (1.09–2.41) | (1.03–2.12) | (0.63–2.17) |
| p-value               | < 0.001     | 0.02        | 0.03        | 0.6         |
| <b>Age &gt; 70</b>    |             |             |             |             |
| Crude hazard ratio    | 2.00        | 1.77        | 2.44        | 1.33        |
| (95% CI)              | (1.44–2.80) | (0.87–3.61) | (1.65–3.61) | (0.41–4.35) |
| p-value               | < 0.001     | 0.1         | < 0.001     | 0.6         |
| Adjusted hazard ratio | 1.93        | 1.62        | 2.37        | 1.41        |
| (95% CI)              | (1.36–2.72) | (0.85–3.08) | (1.47–3.82) | (0.42–4.72) |
| p-value               | < 0.001     | 0.1         | < 0.001     | 0.6         |

Table 4. Indications for revision of TKA inserted due to PTFA and OA, sorted by follow-up. A single revision may have reported more than one indication, explaining the discrepancy between the total number of indications and the total number of revisions

|                                          | Entire follow-up |           | < 1 year |           | 1–5 years |           | > 5 years |           |
|------------------------------------------|------------------|-----------|----------|-----------|-----------|-----------|-----------|-----------|
|                                          | PTFA             | OA        | PTFA     | OA        | PTFA      | OA        | PTFA      | OA        |
| Aseptic loosening                        | 45 (23%)         | 699 (24%) | 4 (7%)   | 88 (10%)  | 25 (26%)  | 424 (29%) | 16 (36%)  | 187 (34%) |
| Pain                                     | 20 (10%)         | 381 (13%) | 3 (5%)   | 91 (10%)  | 12 (13%)  | 238 (16%) | 5 (11%)   | 52 (9%)   |
| Instability                              | 45 (23%)         | 514 (17%) | 18 (32%) | 139 (16%) | 19 (20%)  | 291 (19%) | 8 (18%)   | 84 (15%)  |
| Infection                                | 50 (25%)         | 543 (19%) | 18 (32%) | 308 (35%) | 24 (25%)  | 179 (12%) | 8 (18%)   | 56 (10%)  |
| Polyethylene failur                      | 8 (4%)           | 148 (5%)  | 2 (4%)   | 18 (2%)   | 2 (2%)    | 50 (3%)   | 4 (9%)    | 80 (14%)  |
| Secondary insertion of patella component | 14 (7%)          | 264 (9%)  | 5 (9%)   | 65 (8%)   | 7 (7%)    | 150 (10%) | 2 (4%)    | 49 (9%)   |
| Other                                    | 15 (8%)          | 375 (13%) | 6 (11%)  | 159 (19%) | 7 (7%)    | 167 (11%) | 2 (4%)    | 49 (9%)   |
| Total                                    | 197              | 2,924     | 56       | 868       | 96        | 1,499     | 45        | 557       |

Table 5. Comparison of patient and operation characteristics according to type of arthritis and sorted by whether or not TKA was revised during follow-up

| Characteristics                                    | PTFA                    |                          | OA                        |                          |
|----------------------------------------------------|-------------------------|--------------------------|---------------------------|--------------------------|
|                                                    | Unrevised               | Revised                  | Unrevised                 | Revised                  |
| Observations, n                                    | 1,262 (89%)             | 159 (11%)                | 48,736 (95%)              | 2,361 (5%)               |
| Mean age years <sup>a,b</sup>                      | 63 (SD 13) <sup>e</sup> | 57 (SD 13) <sup>e</sup>  | 69 (SD 9) <sup>e</sup>    | 65 (SD 10) <sup>e</sup>  |
| < 50 years old, n (%)                              | 177 (14%) <sup>e</sup>  | 50 (32%) <sup>e</sup>    | 1,223 (3%) <sup>e</sup>   | 154 (7%) <sup>e</sup>    |
| 50–70 years old, n (%)                             | 691 (55%) <sup>e</sup>  | 80 (50%) <sup>e</sup>    | 22,869 (47%) <sup>e</sup> | 1,390 (59%) <sup>e</sup> |
| > 70 years old, n (%)                              | 394 (31%) <sup>e</sup>  | 29 (18%) <sup>e</sup>    | 24,644 (50%) <sup>e</sup> | 817 (34%) <sup>e</sup>   |
| Mean weight, kg <sup>a</sup>                       | 79 (SD 21)              | 79 (SD 22)               | 83 (SD 19) <sup>e</sup>   | 86 (SD 21) <sup>e</sup>  |
| Sex <sup>b</sup>                                   |                         |                          |                           |                          |
| Female                                             | 717 (57%)               | 90 (57%)                 | 30,955 (64%)              | 1,468 (62%)              |
| Fracture <sup>b</sup>                              |                         |                          |                           |                          |
| Femur                                              | 223 (23%)               | 26 (16%)                 | NA                        | NA                       |
| Tibia                                              | 751 (77%)               | 133 (84%)                | NA                        | NA                       |
| Charnley class <sup>b</sup>                        |                         |                          |                           |                          |
| A                                                  | 982 (78%)               | 127 (80%)                | 21,016 (43%) <sup>e</sup> | 1,129 (48%) <sup>e</sup> |
| B1                                                 | 122 (10%)               | 14 (9%)                  | 16,682 (34%) <sup>e</sup> | 734 (31%) <sup>e</sup>   |
| B2                                                 | 31 (2%)                 | 2 (1%)                   | 8,106 (17%) <sup>e</sup>  | 350 (15%) <sup>e</sup>   |
| C                                                  | 127 (10%)               | 16 (10%)                 | 2,932 (6%) <sup>e</sup>   | 148 (6%) <sup>e</sup>    |
| Mean duration of primary surgery, min <sup>a</sup> | 95 (SD 35) <sup>d</sup> | 106 (SD 44) <sup>d</sup> | 72 (SD 21) <sup>e</sup>   | 75 (SD 24) <sup>e</sup>  |
| Perioperative complications <sup>b</sup>           | 33 (2.5%)               | 7 (4.5%)                 | 341 (0.7%) <sup>d</sup>   | 28 (1.2%) <sup>d</sup>   |
| Component supplementation <sup>b</sup>             | 228 (18%)               | 36 (23%)                 | 1,011 (2%) <sup>c</sup>   | 63 (3%) <sup>c</sup>     |

<sup>a</sup> Wilcoxon rank-sum test.

<sup>b</sup> Chi-square test or Fisher's exact test.

Level of significance: <sup>c</sup> p < 0.05, <sup>d</sup> p < 0.01, and <sup>e</sup> p < 0.001.
